# Supplementary material for: A homozygous stop-gain variant in ARHGAP42 is associated with childhood interstitial lung disease, systemic hypertension, and immunological findings
Source: PLoS Genet. 2021 Jul 7;17(7):e1009639. doi: 10.1371/journal.pgen.1009639 (PMC8289122; doi:10.1371/journal.pgen.1009639)
Supplement: S1 Table — The mean 24-hour systolic blood pressure was at the 95th percentile and the mean 24-hour diastolic ambulatory blood pressure fell above the 95th percentile for sex-age. BP load was elevated (25–50% elevated) for systolic blood pressures. BP load was significantly elevated (>50% elevated) for diastolic blood pressures. Diurnal variation (nocturnal “dipping”) for systolic and diastolic blood pressures was normal. (XLSX) [file pgen.1009639.s001.xlsx]

## Sheet: Sheet1
S1 Table. Ambulatory blood pressure levels of the proband fell within the hypertensive range.
			Proband	95th percentile
	Clinic	Systolic	Unknown	114
		Diastolic		75
	24-hour Mean	Systolic	119	119
		Diastolic	75	74
	Wake Mean	Systolic	125	124
		Diastolic	81	82
	Sleep Mean	Systolic	107	112
		Diastolic	65	67
	Readings >95th %ile	Systolic	0.26
		Diastolic	0.54
	Diurnal Variation	Systolic	0.14
		Diastolic	0.2
